# Supplementary material for: Patterns and organ treatment response of Erdheim-Chester disease with cardiac involvement
Source: PubMed Central journal article supplement — Heart. 2024 May 15;110(13):899–907. doi: 10.1136/heartjnl-2024-323867 (PMC11187388; doi:10.1136/heartjnl-2024-323867), 2024-05-15

**Supplementary table 1.** The overall and heart response of ECD patients using BRAF inhibitor or not.

| Response | Regimen              | CR | PR | SD | PD | P value |
|----------|----------------------|----|----|----|----|---------|
| PER      | BRAF <sub>i</sub>    | 6  | 1  | 0  | 0  | 0.009   |
|          | No BRAF <sub>i</sub> | 4  | 10 | 2  | 2  |         |
| CMAR     | BRAF <sub>i</sub>    | 0  | 6  | 12 | 2  | 0.882   |
|          | No BRAF <sub>i</sub> | 0  | 1  | 5  | 0  |         |
| CMER     | BRAF <sub>i</sub>    | 4  | 3  | 0  | 0  | 0.048   |
|          | No BRAF <sub>i</sub> | 5  | 9  | 5  | 3  |         |
| HR       | BRAF <sub>i</sub>    | 4  | 3  | 0  | 0  | 0.037   |
|          | No BRAF <sub>i</sub> | 4  | 12 | 4  | 3  |         |
| LVR      | BRAF <sub>i</sub>    | 0  | 1  | 5  | 0  | 0.798   |
|          | No BRAF <sub>i</sub> | 0  | 6  | 14 | 1  |         |
| OR       | BRAF <sub>i</sub>    | 2  | 5  | 0  | 0  | 0.245   |
|          | No BRAF <sub>i</sub> | 4  | 13 | 2  | 4  |         |

Abbreviations: BRAF<sub>i</sub>, BRAF inhibitors. CMAR, cardiac mass response. CMER, cardiac metabolic response. CR, complete response; HR, heart response; LVR, large vessel response; OR, overall response; PD, progressive disease; PER, pericardial effusion response; PR, partial response; SD, stable disease.

**Supplementary figure 1.** The treatment correlation between pericardial perfusion response and cardiac metabolic response of the first line treatment, second line treatment and overall treatment.

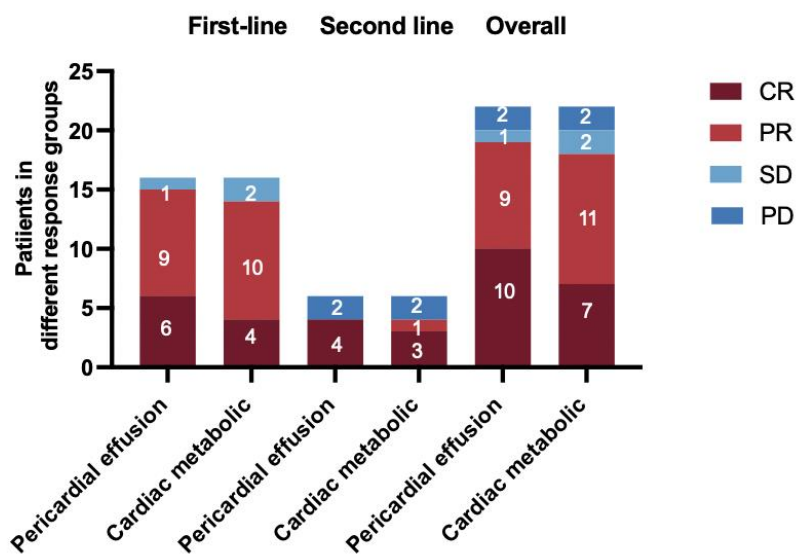

Supplement: heartjnl-2024-323867supp001.pdf [file heartjnl-2024-323867supp001.pdf]
